# Supplementary material for: Switching charge kinetics from type-I to Z-scheme for g-C3N4 and ZnIn2S4 by defective engineering for efficient and durable hydrogen evolution
Source: Royal Society of Chemistry journal article supplement (doi:10.1039/c9se00639g), 2019-01-01
Supplement: c9se00639g1.pdf [file c9se00639g1.pdf]

Support information for

# Switching Charge Kinetic from type-I to Z-Scheme of g-C<sub>3</sub>N<sub>4</sub> and ZnIn<sub>2</sub>S<sub>4</sub> by Defective Engineering for Efficient and Durable Hydrogen Evolution

Mingya Wang<sup>†</sup>, Shushu Huang<sup>†</sup>, Xin Pang, Meiting Song, Chunfang Du\* and Yiguo Su\*

*Inner Mongolia Key Laboratory of Chemistry and Physics of Rare Earth Materials,  
School of Chemistry and Chemical Engineering, Inner Mongolia University, Hohhot,  
Inner Mongolia 010021, PR China*

<sup>†</sup>Mingya Wang and Shushu Huang contributed equally to this work.

Corresponding author. Tel: +86-471-4344579. E-mail address: cesyg@imu.edu.cn (Y. Su). cedchf@imu.edu.cn (C. Du)

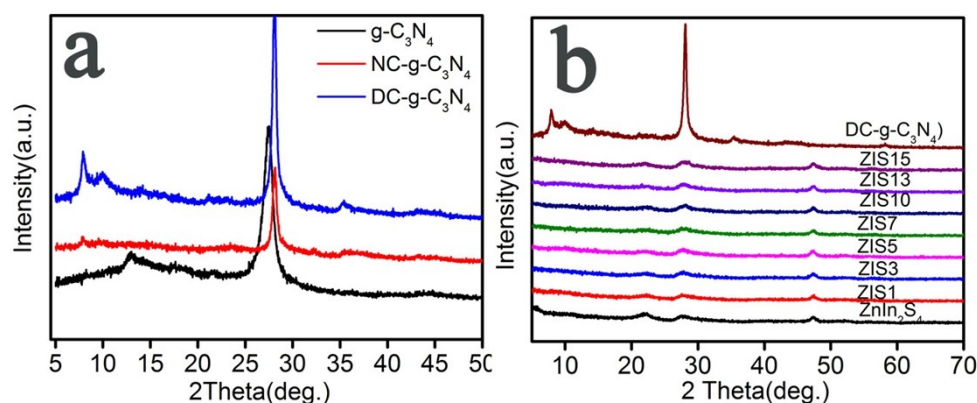

**Fig. S1** XRD patterns of g-C<sub>3</sub>N<sub>4</sub>, NC-g-C<sub>3</sub>N<sub>4</sub> and DC-g-C<sub>3</sub>N<sub>4</sub> (a). XRD patterns of DC-g-C<sub>3</sub>N<sub>4</sub>, ZnIn<sub>2</sub>S<sub>4</sub>, and DC-g-C<sub>3</sub>N<sub>4</sub>/ZnIn<sub>2</sub>S<sub>4</sub> heterojunctions with different DC-g-C<sub>3</sub>N<sub>4</sub> loading content.

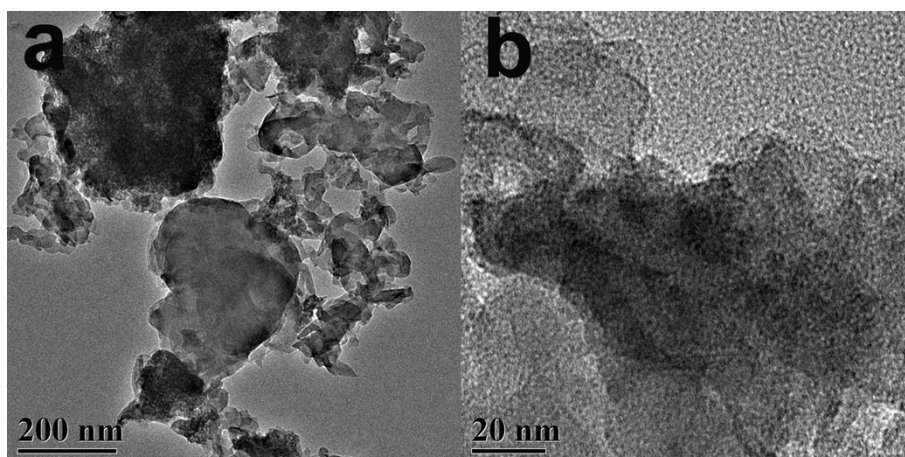

**Fig. S2** TEM images of g-C<sub>3</sub>N<sub>4</sub>.

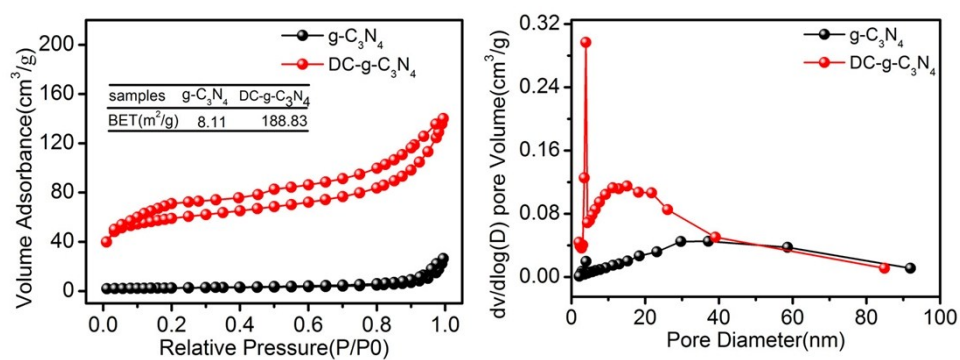

**Fig. S3**  $N_2$  adsorption-desorption isotherms (a) and the corresponding pore size distribution curves (b) of  $g-C_3N_4$  and DC-  $g-C_3N_4$ .

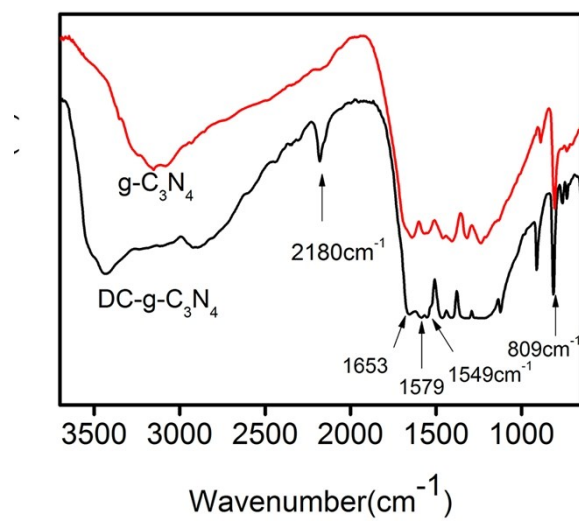

**Fig. S4** FT-IR spectra of g-C<sub>3</sub>N<sub>4</sub> and DC-g-C<sub>3</sub>N<sub>4</sub>.

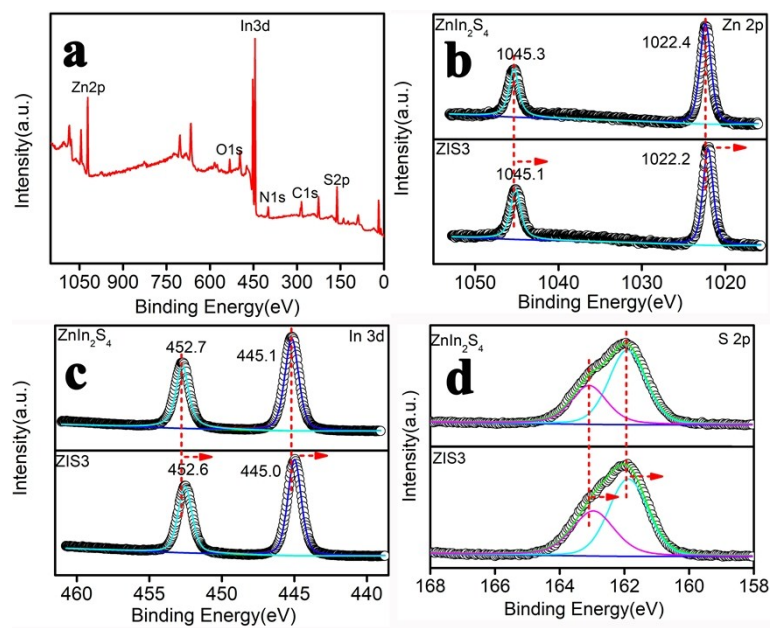

**Fig. S5** XPS spectra: the survey spectrum of ZIS3 (a), Zn 2p orbital, (b) In 3d orbital (c) and S 2p orbital (d), respectively.

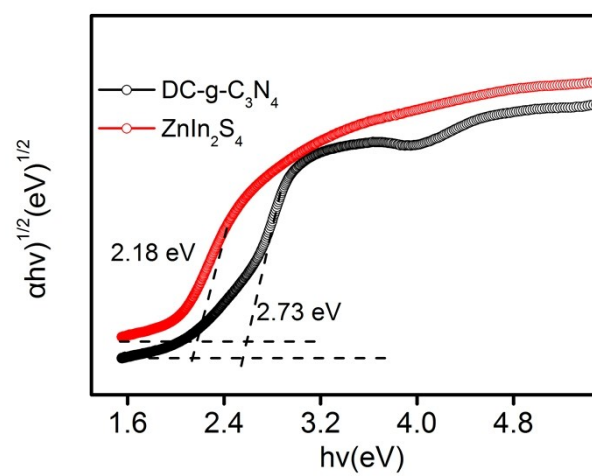

**Fig. S6** Band gap energy of  $\text{ZnIn}_2\text{S}_4$ ,  $\text{DC-g-C}_3\text{N}_4$ .

Table S1 Comparison of AQE of ZIS3 with those of other catalysts reported in literature.

| Entry | Catalysts                                                      | AQE (%) | Wavelength (nm) | ref       |
|-------|----------------------------------------------------------------|---------|-----------------|-----------|
| 1     | ZIS3                                                           | 18.2    | 420             | this work |
| 2     | CNB NS                                                         | 7.45    | 420             | [1]       |
| 3     | MoS <sub>2</sub> /CQDs/ZnIn <sub>2</sub> S <sub>4</sub>        | 25.6    | 420             | [2]       |
| 4     | Pt/Ni(OH) <sub>2</sub> -C <sub>3</sub> N <sub>4</sub>          | 11.2    | 420             | [3]       |
| 5     | $\gamma$ -TiO <sub>2</sub> @ZIF-8                              | 50.89   | 380             | [4]       |
| 6     | quasi-honeycomb g-C <sub>3</sub> N <sub>4</sub>                | 6.27    | 400             | [5]       |
| 7     | g-C <sub>3</sub> N <sub>4</sub> -M <sub>1</sub> U <sub>2</sub> | 74.0    | 400             | [6]       |
| 8     | Pt/CNS                                                         | 2.4     | 420             | [7]       |
| 9     | O substituted g-C <sub>3</sub> N <sub>4</sub>                  | 13.2    | 420             | [8]       |
| 10    | MoS <sub>2</sub> /ZnIn <sub>2</sub> S <sub>4</sub>             | 3.08    | 420             | [9]       |
| 11    | NiS/V-s-ZnIn <sub>2</sub> S <sub>4</sub> /WO <sub>3</sub>      | 72.0    | 420             | [10]      |
| 12    | ZnIn <sub>2</sub> S <sub>4</sub> /MoSe <sub>2</sub>            | 21.39   | 420             | [11]      |

|           |                                                                   |      |        |      |
|-----------|-------------------------------------------------------------------|------|--------|------|
| <b>13</b> | Co-P/ZnIn <sub>2</sub> S <sub>4</sub>                             | 4.3  | 420    | [12] |
| <b>14</b> | g-C <sub>3</sub> N <sub>4</sub> @ZnIn <sub>2</sub> S <sub>4</sub> | 7.05 | 420    | [13] |
| <b>15</b> | MoS <sub>2</sub> /Cu-ZnIn <sub>2</sub> S <sub>4</sub>             | 13.6 | 420    | [14] |
| <b>16</b> | Cu <sub>3</sub> P-FCN                                             | 3.74 | 420    | [15] |
| <b>17</b> | B/P-CNNs                                                          | 3.24 | 420    | [16] |
| <b>18</b> | CNAs                                                              | 5.07 | 420    | [17] |
| <b>19</b> | FeP/g-C <sub>3</sub> N <sub>4</sub>                               | 1.57 | 420    | [18] |
| <b>20</b> | g-C <sub>3</sub> N <sub>4</sub> /UMOFNs                           | 2.34 | 405    | [19] |
| <b>21</b> | 3D CCNS-50                                                        | 7.80 | 420    | [20] |
| <b>22</b> | PtAu-2/g-C <sub>3</sub> N <sub>4</sub>                            | 0.45 | 420±10 | [21] |
| <b>23</b> | HC-CN                                                             | 6.17 | 420    | [22] |
| <b>24</b> | C-PAN/g-C <sub>3</sub> N <sub>4</sub>                             | 5.60 | 420    | [23] |
| <b>25</b> | g-C <sub>3</sub> N <sub>4</sub> NS/TMC                            | 4.10 | 420    | [24] |

---

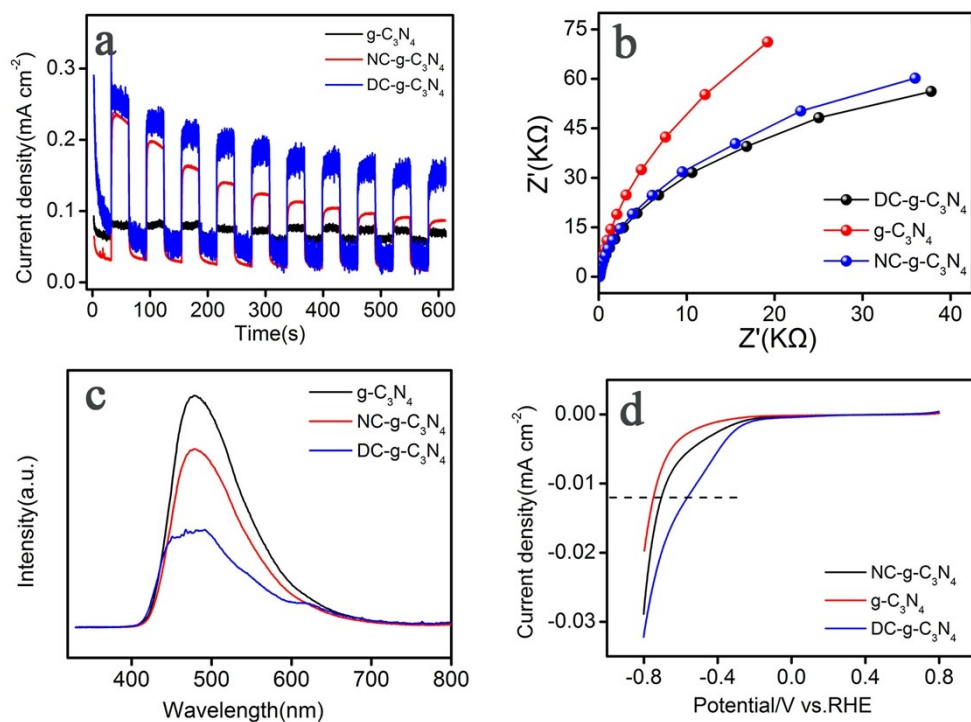

**Fig. S7** Transient photocurrent–time ( $I-t$ ) curves (a), electrochemical impedance spectroscopy (EIS) Nyquist plots of different samples in 0.2 M  $\text{Na}_2\text{SO}_4$  solution (b), photoluminescence spectra (c) and linear sweep voltammetry (LSV) curves (d) of pristine  $g\text{-C}_3\text{N}_4$ ,  $\text{NC-g-C}_3\text{N}_4$  and  $\text{DC-g-C}_3\text{N}_4$ .

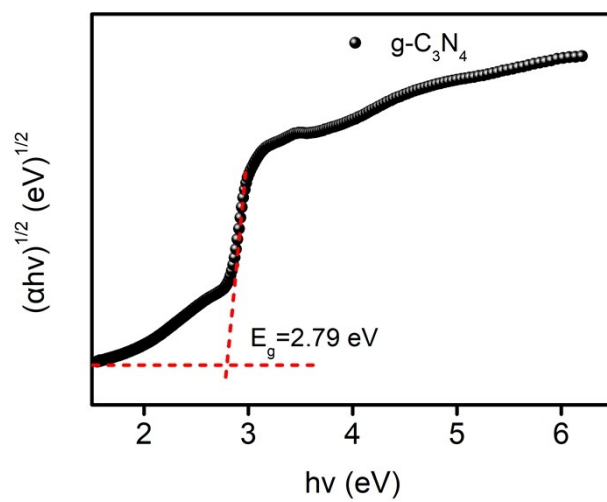

**Fig. S8** Band gap energy of pristine g-C<sub>3</sub>N<sub>4</sub>.

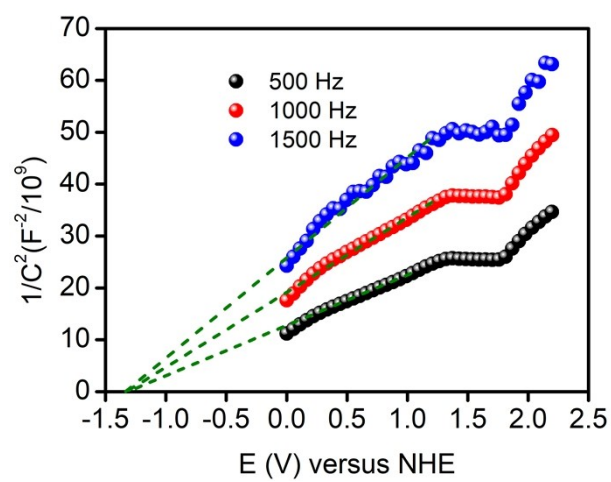

**Fig. S9** Mott-Schottky plots of pristine g-C<sub>3</sub>N<sub>4</sub>.

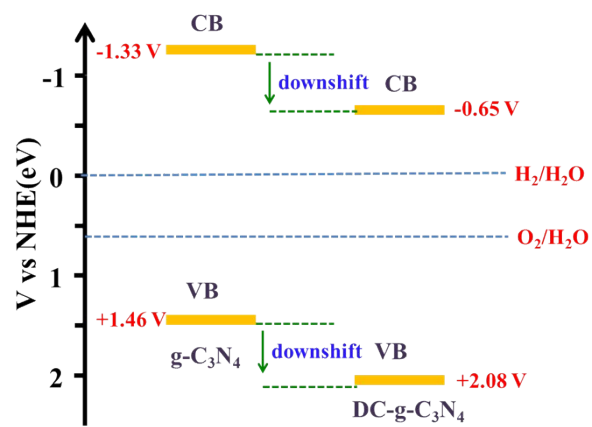

**Fig. S10** Electronic structure of pristine  $\text{g-C}_3\text{N}_4$  and  $\text{DC-g-C}_3\text{N}_4$ .

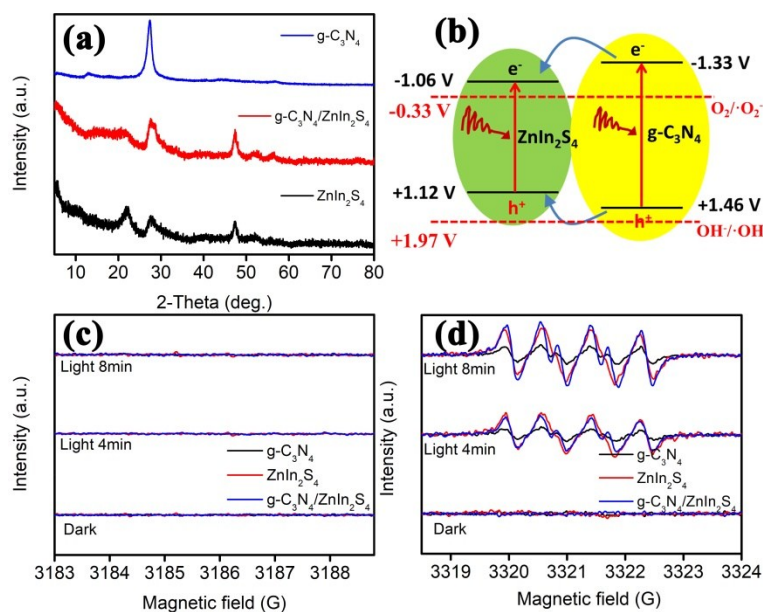

**Fig. S11** XRD patterns of the as-prepared samples (a). Plausible charge transfer process between pristine g-C<sub>3</sub>N<sub>4</sub> and ZnIn<sub>2</sub>S<sub>4</sub> (b). •OH (c) and •O<sub>2</sub><sup>-</sup> (d) radical active species text by EPR over g-C<sub>3</sub>N<sub>4</sub>, ZnIn<sub>2</sub>S<sub>4</sub> and g-C<sub>3</sub>N<sub>4</sub>/ZnIn<sub>2</sub>S<sub>4</sub> photocatalysts using DMPO as radical adducts.

Pristine g-C<sub>3</sub>N<sub>4</sub> and g-C<sub>3</sub>N<sub>4</sub>/ZnIn<sub>2</sub>S<sub>4</sub> photocatalysts were also prepared in this work for comparison and the corresponding XRD patterns were given in Fig. S11a. On the basis of Mott-Schottky data, the conduction band and valence band edge potentials were determined to be -1.33 V and 1.46 V versus NHE, respectively. And the band edge alignment of pristine g-C<sub>3</sub>N<sub>4</sub> and ZnIn<sub>2</sub>S<sub>4</sub> were illustrated in Fig. 11b. Clearly, a straddling gap feature exists between g-C<sub>3</sub>N<sub>4</sub> and ZnIn<sub>2</sub>S<sub>4</sub>. Hence, the photogenerated electrons and holes are likely to transfer to ZnIn<sub>2</sub>S<sub>4</sub> from g-C<sub>3</sub>N<sub>4</sub>, forming a type-I structure. Furthermore, EPR analyses can give further evidence of the above supposition. As shown in Fig. 11c, it is seen that no obvious DMPO-•OH EPR signal was observed for all as-prepared samples. On the other hand, the EPR data of •O<sub>2</sub><sup>-</sup> (Fig. S11d) active species demonstrated that the reduction ability of photogenerated electrons for g-C<sub>3</sub>N<sub>4</sub>/ZnIn<sub>2</sub>S<sub>4</sub> heterojunction had no obvious changed in comparison to

pristine g-C<sub>3</sub>N<sub>4</sub> and ZnIn<sub>2</sub>S<sub>4</sub>, suggesting the formation of type-I structure between ZnIn<sub>2</sub>S<sub>4</sub> and g-C<sub>3</sub>N<sub>4</sub> without defects.

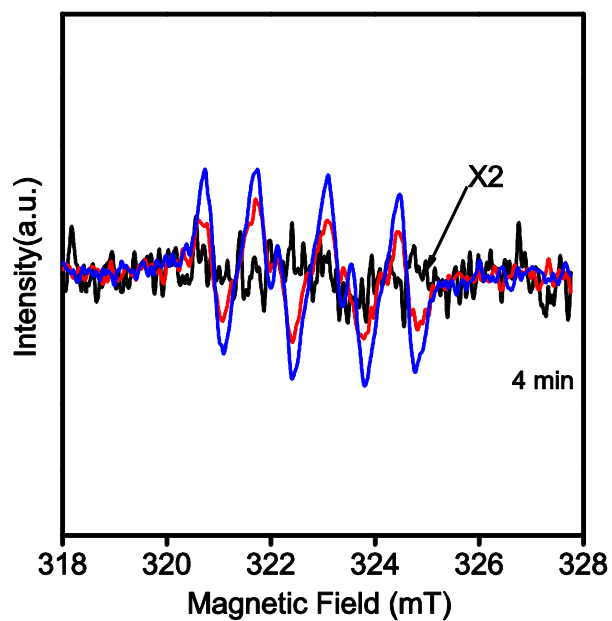

**Fig. S12** EPR spectra of DC-g-C<sub>3</sub>N<sub>4</sub>, ZnIn<sub>2</sub>S<sub>4</sub> and ZIS3 using DMPO as radical adducts for trapping  $\bullet\text{O}_2^-$  species under visible light irradiation. The enlarge EPR signal represents DC-g-C<sub>3</sub>N<sub>4</sub>.

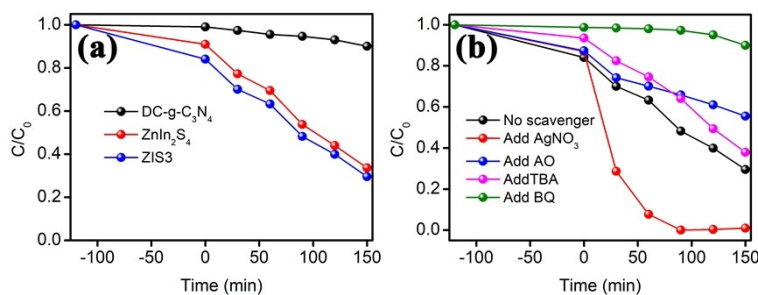

**Fig. S13** Photocatalytic methyl orange (MO) degradation activity of DC-g-C<sub>3</sub>N<sub>4</sub>, ZnIn<sub>2</sub>S<sub>4</sub> and ZIS3 (a). Effects of different scavengers on methyl orange degradation in the presence of ZIS3 under visible light irradiation (b).

Photocatalytic methyl orange degradation was selected as the model reaction aiming to investigate the photooxidation ability of the obtained samples. Fig. S13a declared that ZIS3 exhibited the higher degradation efficiency than their counterparts. And different scavengers were added in order to determine the primary radical species during the photocatalytic process, as displayed in Fig. S13b. Clearly, the photocatalytic performance of ZIS3 was apparently inhibited with the addition of ammonium oxalate (AO), tert-butyl alcohol (TBA) and benzoquinone (BQ) as hole ( $h^+$ ), hydroxyl radical ( $\cdot OH$ ) and superoxide radicals ( $\cdot O_2^-$ ) scavenger, respectively. Meanwhile, the photocatalytic degradation efficiency was greatly enhanced with the addition of AgNO<sub>3</sub> because of the improvement of the separation efficiency of photogenerated carriers after Ag reduction. According to previous reports, hydroxyl radical ( $\cdot OH$ ) and superoxide radicals ( $\cdot O_2^-$ ) exhibited strong oxidation ability which play important roles in photocatalytic reaction. Hence, the photo-degradation MO was dominated by the photogenerated holes and the subsequent generated  $\cdot O_2^-$  and  $\cdot OH$ .

## Reference

- [1] W. Xing, G. Chen, C. Li, Z. Han, Y. Hu, Q. Meng, Doping effect of non-metal group in porous ultrathin g-C<sub>3</sub>N<sub>4</sub> nanosheets towards synergistically improved photocatalytic hydrogen evolution, *Nanoscale* 10 (2018) 5239-5245.
- [2] B. Wang, Z. Deng, X. Fu, Z. Li, MoS<sub>2</sub>/CQDs obtained by photoreduction for assembly of a ternary MoS<sub>2</sub>/CQDs/ZnIn<sub>2</sub>S<sub>4</sub> nanocomposite for efficient photocatalytic hydrogen evolution under visible light, *J. Mater. Chem. A* 6 (2018) 19735-19742.
- [3] S. Sun, Y. Zhang, G. Shen, Y. Wang, X. Liu, Z. Duan, L. Pan, X. Zhang, J. Zou, Photoinduced composite of Pt decorated Ni(OH)<sub>2</sub> as strongly synergetic cocatalyst to boost H<sub>2</sub>O activation for photocatalytic overall water splitting, *Appl. Catal. B: Environmental* 243 (2019) 253-261.
- [4] M. Zhang, Q. Shang, Y. Wan, Q. Cheng, G. Liao, Z. Pan, Self-template synthesis of double-shell TiO<sub>2</sub>@ZIF-8 hollow nanospheres via sonocrystallization with enhanced photocatalytic activities in hydrogen generation, *Appl. Catal. B: Environmental* 241 (2019) 149-158.
- [5] R. Cao, H. Yang, X. Deng, P. Sun, S. Zhang, X. Xu, Construction of 3DOM carbon nitrides with quasi-honeycomb structures for efficient photocatalytic H<sub>2</sub> production, *ChemCatChem* 10 (2018) 5656-5664.
- [6] D. Ruan, S. Kim, M. Fujitsuka, T. Majima, Defects rich g-C<sub>3</sub>N<sub>4</sub> with mesoporous

structure for efficient photocatalytic H<sub>2</sub> production under visible light irradiation, *Appl. Catal. B: Environmental* 238 (2018) 638-646.

[7] M. Liu, P. Xia, L. Zhang, B. Cheng, J. Yu, Enhanced photocatalytic H<sub>2</sub>-production activity of g-C<sub>3</sub>N<sub>4</sub> nanosheets via optimal photodeposition of Pt as cocatalyst, *ACS Sustain. Chem. Eng.* 6 (2018) 10472-10480.

[8] C. Liu, H. Huang, W. Cui, F. Dong, Y. Zhang, Band structure engineering and efficient charge transport in oxygen substituted g-C<sub>3</sub>N<sub>4</sub> for superior photocatalytic hydrogen evolution, *Appl. Catal. B: Environmental* 230 (2018) 115-124.

[9] C. Liu, B. Chai, C. Wang, J. Yan, Z. Ren, Solvothermal fabrication of MoS<sub>2</sub> anchored on ZnIn<sub>2</sub>S<sub>4</sub> microspheres with boosted photocatalytic hydrogen evolution activity, *Int. J. Hydrogen Energy* 43 (2018) 6977-6986.

[10] Z. Li, J. Hou, B. Zhang, S. Cao, Y. Wu, Z. Gao, X. Nie, L. Sun, Two-dimensional Janus heterostructures for superior Z-scheme photocatalytic water splitting, *Nano Energy* 59 (2019) 537-544.

[11] D. Zeng, L. Xiao, W. Ong, P. Wu, H. Zheng, Y. Chen, D. Peng, Hierarchical ZnIn<sub>2</sub>S<sub>4</sub>/MoSe<sub>2</sub> nanoarchitectures for efficient noble-metal-free photocatalytic hydrogen evolution under visible light, *ChemSusChem* 10 (2017) 4624-4631.

[12] Q. Liu, M. Wang, Y. He, X. Wang, W. Su, Photochemical route for synthesizing Co-P alloy decorated ZnIn<sub>2</sub>S<sub>4</sub> with enhanced photocatalytic H<sub>2</sub> production activity

under visible light irradiation, *Nanoscale* 10 (2018) 19100-19106.

[13] B. Lin, H. Li, H. An, W. Hao, J. Wei, Y. Dai, C. Ma, G. Yang, Preparation of 2D/2D g-C<sub>3</sub>N<sub>4</sub> nanosheet@ZnIn<sub>2</sub>S<sub>4</sub> nanoleaf heterojunctions with well-designed high-speed charge transfer nanochannels towards high-efficiency photocatalytic hydrogen evolution, *Appl. Catal. B: Environmental* 220 (2018) 542-552.

[14] Y. Yuan, D. Chen, J. Zhong, L. Yang, J. Wang, M. Liu, W. Tu, Z. Yu, Z. Zou, Interface engineering of a noble-metal-free 2D-2D MoS<sub>2</sub>/Cu-ZnIn<sub>2</sub>S<sub>4</sub> photocatalyst for enhanced photocatalytic H<sub>2</sub> production, *J. Mater. Chem. A* 5 (2017) 15771-15779.

[15] W. Wang, X. Zhao, Y. Cao, Z. Yan, R. Zhu, Y. Tao, X. Chen, D. Zhang, G. Li, D. Phillips, Copper phosphide-enhanced lower charge trapping occurrence in graphitic-C<sub>3</sub>N<sub>4</sub> for efficient noble-metal-free photocatalytic H<sub>2</sub> evolution, *ACS Appl. Mater. Inter.* (2019).

[16] B. Li, Y. Si, B. Zhou, Q. Fang, Y. Li, W. Huang, W. Hu, A. Pan, X. Fan, G. Huang, Doping-induced hydrogen-bond engineering in polymeric carbon nitride to significantly boost the photocatalytic H<sub>2</sub> evolution performance, *ACS Appl. Mater. Inter.* (2019).

[17] B. Lin, G. Yang, L. Wang, Stacking-layer-number dependence of water Adsorption in 3D ordered close-packed g-C<sub>3</sub>N<sub>4</sub> nanosphere arrays for photocatalytic hydrogen evolution, *Angew. Chem. Int. Ed.* 58 (2019) 4587-4591.

- [18] D. Zeng, T. Zhou, W. Ong, M. Wu, X. Duan, W. Xu, Y. Chen, Y. Zhu, D. Peng, Sub-5 nm ultra-fine FeP nanodots as efficient co-catalysts modified porous g-C<sub>3</sub>N<sub>4</sub> for precious-metal-free photocatalytic hydrogen evolution under visible light, ACS Appl. Mater. Inter. 11 (2019) 5651-5660.
- [19] Y. Liang, R. Shang, J. Lu, W. An, J. Hu, L. Liu, W. Cui, 2D MOFs enriched g-C<sub>3</sub>N<sub>4</sub> nanosheets for highly efficient charge separation and photocatalytic hydrogen evolution from water, Int. J. Hydrogen Energy 44 (2019) 2797-2810.
- [20] H. Gao, R. Cao, S. Zhang, H. Yang, X. Xu, Three-dimensional hierarchical g-C<sub>3</sub>N<sub>4</sub> architectures assembled by ultrathin self-doped nanosheets: extremely facile hexamethylenetetramine activation and superior photocatalytic hydrogen evolution, ACS Appl. Mater. Inter. 11 (2019) 2050-2059.
- [21] K. Bhunia, M. Chandra, S. Khilari, D. Pradhan, Bimetallic PtAu alloy nanoparticles-integrated g-C<sub>3</sub>N<sub>4</sub> hybrid as an efficient photocatalyst for water-to-hydrogen conversion, ACS Appl. Mater. Inter. 11 (2019) 478-488.
- [22] W. Xing, W. Tu, Z. Han, Y. Hu, Q. Meng, G. Chen, Template-induced high-crystalline g-C<sub>3</sub>N<sub>4</sub> nanosheets for enhanced photocatalytic H<sub>2</sub> Evolution, ACS Energy Lett. 3 (2018) 514-519.
- [23] F. He, G. Chen, J. Miao, Z. Wang, D. Su, S. Liu, W. Cai, L. Zhang, S. Hao, B. Liu, Sulfur-mediated Self-templating synthesis of tapered C-PAN/g-C<sub>3</sub>N<sub>4</sub> composite

nanotubes toward efficient photocatalytic H<sub>2</sub> evolution, ACS Energy Lett. 1 (2016) 969-975.

[24] O. Elbanna, M. Fujitsuka, T. Majima, g-C<sub>3</sub>N<sub>4</sub>/TiO<sub>2</sub> mesocrystals composite for H<sub>2</sub> evolution under visible-light irradiation and its charge carrier dynamics, ACS Appl. Mater. Inter. 9 (2017) 34844-34854.
